# Supplementary material
Source: PubMed Central journal article supplement (PMC5189617)
Supplement: supp_the2016-0105_Supplemental_Appendix.pdf [file supp_the2016-0105_Supplemental_Appendix.pdf]

Supplemental Appendix for:  
Prognostic Value of the Cumulative Cisplatin Dose During Concurrent Chemoradiotherapy in Locoregionally-Advanced Nasopharyngeal Carcinoma: A Secondary Analysis of a Prospective Phase III Clinical Trial  
Jun Ma et al.

#### **Appendix S1.**

The median cumulative cisplatin dose (CCD) for the entire cohort was 240 mg/m<sup>2</sup> (interquartile range, 200-280). To address whether low or high doses makes a difference, further analysis was conducted to compared the survival difference between patients receiving a CCD  $\leq$  200 mg/m<sup>2</sup> (low CCD group) and those who received a CCD  $\geq$  280 mg/m<sup>2</sup> (high CCD group). In total, 113 (37.9%) patients received a CCD  $\leq$  200 mg/m<sup>2</sup> and 78 (26.2%) patients received a CCD  $\geq$  280 mg/m<sup>2</sup>.

The baseline characteristics of the 191 patients were listed in Table 1. The high CCD group had a higher percentage of patients receiving intensity-modulated radiotherapy (IMRT). Although, the high CCD group had more patients with N2-3 stage compared with that in low CCD group, the overall stage were well balanced between the two groups.

The 5-year overall survival (OS), disease-free survival (DFS), locoregional relapse-free survival (LRRFS) and distant metastasis-free survival (DMFS) rates for low CCD group vs. high CCD group were 76.2% vs. 82.4% ( $P = 0.602$ ), 67.8% vs. 71.1% ( $P = 0.713$ ), 86.8% vs. 90.2% ( $P = 0.518$ ) and 79.7% vs. 76.5% ( $P = 0.548$ ). After adjusting for various prognostic factors, multivariate analysis revealed CCD was still not an independent prognostic factor for patients with locoregionally advanced NPC (Table 2).

Supplemental Appendix for:  
Prognostic Value of the Cumulative Cisplatin Dose During Concurrent Chemoradiotherapy in Locoregionally-Advanced Nasopharyngeal Carcinoma: A Secondary Analysis of a Prospective Phase III Clinical Trial  
Jun Ma et al.

**Table S1.** Basic characteristics of the 191 patients with locoregionally-advanced NPC receiving concurrent chemoradiotherapy

| Characteristic             | Cumulative cisplatin dose          |                                    | <i>P</i> <sup>a</sup> |
|----------------------------|------------------------------------|------------------------------------|-----------------------|
|                            | ≤ 240 mg/m <sup>2</sup><br>No. (%) | ≥ 280 mg/m <sup>2</sup><br>No. (%) |                       |
| Sex                        |                                    |                                    | 0.185                 |
| Male                       | 77 (68.1)                          | 60 (76.9)                          |                       |
| Female                     | 36 (31.9)                          | 18 (23.1)                          |                       |
| KPS                        |                                    |                                    | 0.213                 |
| ≥ 90                       | 86 (76.1)                          | 53 (67.9)                          |                       |
| < 90                       | 27 (23.9)                          | 25 (32.1)                          |                       |
| Age (years)                |                                    |                                    | 0.384                 |
| <45                        | 45 (39.8)                          | 36 (46.2)                          |                       |
| ≥ 45                       | 68 (60.2)                          | 42 (53.8)                          |                       |
| T category <sup>b</sup>    |                                    |                                    | 0.087                 |
| T1                         | 7 (6.2)                            | 1 (1.3)                            |                       |
| T2                         | 24 (21.2)                          | 27 (34.6)                          |                       |
| T3                         | 55 (48.7)                          | 31 (39.7)                          |                       |
| T4                         | 27 (23.9)                          | 19 (24.4)                          |                       |
| N category <sup>b</sup>    |                                    |                                    | 0.003                 |
| N1                         | 40 (35.4)                          | 13 (16.7)                          |                       |
| N2                         | 67 (59.3)                          | 53 (67.9)                          |                       |
| N3                         | 6 (5.3)                            | 12 (15.4)                          |                       |
| Overall stage <sup>b</sup> |                                    |                                    | 0.115                 |
| III                        | 84 (74.3)                          | 49 (62.8)                          |                       |
| IVA                        | 23 (20.4)                          | 19 (24.4)                          |                       |
| IVB                        | 6 (5.3)                            | 10 (12.8)                          |                       |
| Radiotherapy technique     |                                    |                                    | < 0.001               |
| 2D/3DRT                    | 65 (57.5)                          | 66 (84.6)                          |                       |
| IMRT                       | 48 (42.5)                          | 12 (15.4)                          |                       |

Abbreviation: KPS = Karnofsky performance score; 2DRT = 2-dimensional radiotherapy; 3DRT = 3-dimensional radiotherapy; IMRT = intensity-modulated radiotherapy; NPC = nasopharyngeal carcinoma.

<sup>a</sup>*P*-values were calculated using chi-square test (or Fisher's exact test if indicated).

<sup>b</sup> According to the 6<sup>th</sup> edition of the UICC/AJCC staging system.

Supplemental Appendix for:

Prognostic Value of the Cumulative Cisplatin Dose During Concurrent Chemoradiotherapy in Locoregionally-Advanced Nasopharyngeal Carcinoma: A Secondary Analysis of a Prospective Phase III Clinical Trial

Jun Ma et al.

**Table S2.** Multivariate analysis of variables correlated with clinical outcomes in the 191 patients with locoregional advanced-stage NPC

| Endpoints                                                    | HR    | 95% CI      | <i>P</i> <sup>a</sup> |
|--------------------------------------------------------------|-------|-------------|-----------------------|
| <b>OS</b>                                                    |       |             |                       |
| Sex, female vs. male                                         | 0.654 | 0.311-1.375 | 0.263                 |
| KPS, ≥ 90 vs. < 90                                           | 0.697 | 0.353-1.376 | 0.298                 |
| Age, ≥ 45 vs. < 45 years                                     | 1.759 | 0.917-3.372 | 0.089                 |
| T category, T3-4 vs. T1-2                                    | 1.164 | 0.546-2.478 | 0.694                 |
| N category, N2 vs. N1                                        | 1.101 | 0.539-2.247 | 0.792                 |
| N category, N3 vs. N1                                        | 2.736 | 1.044-7.173 | 0.041                 |
| Radiotherapy technique, 2D/3DRT vs. IMRT                     | 0.657 | 0.323-1.336 | 0.247                 |
| Cumulative cisplatin dose, ≤ 200 vs. ≥ 280 mg/m <sup>2</sup> | 0.675 | 0.342-1.331 | 0.256                 |
| <b>DFS</b>                                                   |       |             |                       |
| Sex, female vs. male                                         | 0.683 | 0.366-1.273 | 0.230                 |
| KPS, ≥ 90 vs. < 90                                           | 0.845 | 0.470-1.519 | 0.573                 |
| Age, ≥ 45 vs. < 45 years                                     | 1.434 | 0.834-2.464 | 0.192                 |
| T category, T3-4 vs. T1-2                                    | 0.980 | 0.518-1.854 | 0.950                 |
| N category, N2 vs. N1                                        | 1.117 | 0.607-2.056 | 0.721                 |
| N category, N3 vs. N1                                        | 2.181 | 0.904-5.262 | 0.083                 |
| Radiotherapy technique, 2D/3DRT vs. IMRT                     | 0.745 | 0.410-1.352 | 0.332                 |
| Cumulative cisplatin dose, ≤ 200 vs. ≥ 280 mg/m <sup>2</sup> | 0.787 | 0.450-1.375 | 0.401                 |
| <b>LRRFS</b>                                                 |       |             |                       |
| Sex, female vs. male                                         | 0.706 | 0.250-1.993 | 0.510                 |
| KPS, ≥ 90 vs. < 90                                           | 2.325 | 0.661-8.177 | 0.189                 |
| Age, ≥ 45 vs. < 45 years                                     | 0.788 | 0.308-2.020 | 0.620                 |
| T category, T3-4 vs. T1-2                                    | 1.008 | 0.333-3.045 | 0.989                 |
| N category, N2 vs. N1                                        | 0.741 | 0.269-2.039 | 0.562                 |
| N category, N3 vs. N1                                        | 2.508 | 0.707-8.903 | 0.155                 |
| Radiotherapy technique, 2D/3DRT vs. IMRT                     | 0.490 | 0.163-1.474 | 0.204                 |
| Cumulative cisplatin dose, ≤ 200 vs. ≥ 280 mg/m <sup>2</sup> | 0.547 | 0.206-1.456 | 0.227                 |
| <b>DMFS</b>                                                  |       |             |                       |
| Sex, female vs. male                                         | 0.607 | 0.279-1.318 | 0.207                 |
| KPS, ≥ 90 vs. < 90                                           | 0.694 | 0.358-1.345 | 0.279                 |
| Age, ≥ 45 vs. < 45 years                                     | 1.635 | 0.847-3.156 | 0.143                 |
| T category, T3-4 vs. T1-2                                    | 1.033 | 0.478-2.230 | 0.934                 |
| N category, N2 vs. N1                                        | 1.073 | 0.522-2.202 | 0.849                 |
| N category, N3 vs. N1                                        | 1.639 | 0.543-4.941 | 0.381                 |
| Radiotherapy technique, 2D/3DRT vs. IMRT                     | 0.918 | 0.466-1.810 | 0.805                 |
| Cumulative cisplatin dose, ≤ 200 vs. ≥ 280 mg/m <sup>2</sup> | 1.066 | 0.543-2.094 | 0.853                 |

Abbreviations: NPC = nasopharyngeal carcinoma; OS = overall survival; DFS = disease-free survival; LRRFS = locoregional relapse-free survival; DMFS = distant metastasis-free survival; KPS = Karnofsky performance score; 2DRT = 2-dimensional radiotherapy; 3D = 3-dimensional radiotherapy; IMRT = intensity-modulated radiotherapy. HR = hazard ratio; CI = confidence interval.

Supplemental Appendix for:

Prognostic Value of the Cumulative Cisplatin Dose During Concurrent Chemoradiotherapy in Locoregionally-Advanced Nasopharyngeal Carcinoma: A Secondary Analysis of a Prospective Phase III Clinical Trial

Jun Ma et al.
